# Supplementary material for: Uniform core–shell nanobiscuits of Fe7S8@C for lithium-ion and sodium-ion batteries with excellent performance
Source: Royal Society of Chemistry journal article supplement (doi:10.1039/c8ta00985f), 2018-01-01
Supplement: c8ta00985f1.pdf [file c8ta00985f1.pdf]

## Supporting information

# Uniformly Core-shell Nanobiscuits of Fe<sub>7</sub>S<sub>8</sub>@C for Lithium-ion and Sodium-ion Batteries with Excellent Performance

Ludi Shi<sup>a†</sup>, Dongzhi Li<sup>a,b†</sup>, Jiali Yu<sup>a</sup>, Huichao Liu<sup>a,b</sup>, Yong Zhao<sup>a,b</sup>, Hailin Xin<sup>a</sup>,

Yemao Lin<sup>a</sup>, Chengdong Lin<sup>a</sup>, Cuihua Li<sup>a</sup>, Caizhan Zhu<sup>a\*</sup>

<sup>a</sup>*Department of Chemistry and Environmental Engineering, Shenzhen University,*

*Shenzhen, Guangdong, 518060, P. R. China.*

<sup>b</sup>*Institute of Chemistry, Chinese Academy of Sciences, Beijing, 100190, P. R. China.*

<sup>†</sup>These authors contribute equally to this manuscript.

\*Corresponding author. E-mail address: [czzhu@szu.edu.cn](mailto:czzhu@szu.edu.cn) (C. Zhu)

**Table S1.** A comparison of electrochemical properties of metal sulfides for LIBs and SIBs.

| Types of materials                        | Types of battery | Voltage range(V) | Cycling performance                                              | Reference |
|-------------------------------------------|------------------|------------------|------------------------------------------------------------------|-----------|
| CoS <sub>2</sub> Nanobubble Hollow Prisms | LIBs             | 0.05-3           | 737 mAh g <sup>-1</sup> after 200 cycles at 1 A g <sup>-1</sup>  | 1         |
| CoS/C                                     | SIBs             | 0.01-3           | 542 mAh g <sup>-1</sup> after 2000 cycles at 1 A g <sup>-1</sup> | 2         |
| Fe <sub>7</sub> S <sub>8</sub> @C NCs     | SIBs             | 0.08-3           | 447 mAh g <sup>-1</sup> after 1000 cycles at                     | 3         |

|                                                                                      |      |          |                                                                           |    |
|--------------------------------------------------------------------------------------|------|----------|---------------------------------------------------------------------------|----|
|                                                                                      |      |          | 180 mA g <sup>-1</sup>                                                    |    |
| Hollow nanocubes<br>PBC1-1S                                                          | SIBs | 0.01-3   | 87 mAh g <sup>-1</sup> after<br>150 cycles at 500<br>mA g <sup>-1</sup>   | 4  |
| NiS nanoplates                                                                       | LIB  | 0.005-3  | 468 mAh g <sup>-1</sup> after<br>100 cycles at 1 A<br>g <sup>-1</sup>     | 5  |
|                                                                                      | SIBs | 0.005-3  | 166 mAh g <sup>-1</sup> after<br>100 cycles at 1 A<br>g <sup>-1</sup>     |    |
| CoS <sub>2</sub> /NCNTF electrode                                                    | LIBs | 0.05-3   | 973 mAh g <sup>-1</sup> after<br>160 cycles at 1A<br>g <sup>-1</sup>      | 6  |
| Fe <sub>3</sub> O <sub>4</sub> /Fe <sub>1-x</sub> S@C@MoS <sub>2</sub><br>nanosheets | LIBs | 0.01-3   | 1142 mAh g <sup>-1</sup><br>after 700 cycles at<br>1A g <sup>-1</sup>     | 7  |
|                                                                                      | SIBs | 0.01-3   | 402 mAh g <sup>-1</sup> after<br>1000 cycles at 1A<br>g <sup>-1</sup>     |    |
| FeS <sub>2</sub> @C yolk-shell<br>nanoboxes                                          | SIBs | 0.1-2    | 330 mAh g <sup>-1</sup> after<br>800 cycles at 2A<br>g <sup>-1</sup>      | 8  |
| Mesoporous NiS <sub>2</sub><br>Nanospheres                                           | SIBs | 0.01-2.9 | 319 mAh g <sup>-1</sup> after<br>1000 cycles at<br>500 mA g <sup>-1</sup> | 9  |
| MoS <sub>2</sub> /SnS <sub>2</sub> -GS                                               | LIBs | 0.01-3   | 772 mAh g <sup>-1</sup> after<br>200cycles at 750<br>mA g <sup>-1</sup>   | 10 |
|                                                                                      | SIBs | 0.01-3   | 546 mAh g <sup>-1</sup> after<br>150 cycles at 1.5<br>A g <sup>-1</sup>   |    |
| TiO <sub>2</sub> @NC@MoS <sub>2</sub>                                                | LIBs | 0.01-3   | 590 mAh g <sup>-1</sup> after<br>200 cycles at 1 A<br>g <sup>-1</sup>     | 11 |
| EG-MoS <sub>2</sub>                                                                  | LIBs | 0.01-3   | 1250 mAh g <sup>-1</sup><br>after 150 cycles at<br>1 A g <sup>-1</sup>    | 12 |
|                                                                                      | SIBs | 0.01-3   | 509 mAh g <sup>-1</sup> after<br>250 cycles at 1 A<br>g <sup>-1</sup>     |    |
| spongy CoS <sub>2</sub> /C                                                           | LIBs | 0.01-3   | 610 mAh g <sup>-1</sup> after<br>120 cycles at 500<br>mA g <sup>-1</sup>  | 13 |

|                                       |      |          |                                                                                                                                                  |                  |
|---------------------------------------|------|----------|--------------------------------------------------------------------------------------------------------------------------------------------------|------------------|
|                                       | SIBs | 0.01-3   | 358.7 mAh g <sup>-1</sup> after 60 cycles at 500 mA g <sup>-1</sup>                                                                              |                  |
| SnS@C nanotubes                       | SIBs | 0.01-3   | 440.3 mAh g <sup>-1</sup> after 100 cycles at 200 mA g <sup>-1</sup>                                                                             | 14               |
| ce-V <sub>5</sub> S <sub>8</sub> -C   | SIBs | 0.01-3   | 496 mAh g <sup>-1</sup> after 500 cycles at 1 A g <sup>-1</sup>                                                                                  | 15               |
| Fe <sub>1-x</sub> S@CNTs              | SIBs | 0.01-2.3 | 449.2 mAh g <sup>-1</sup> after 200 cycles at 500 mA g <sup>-1</sup>                                                                             | 16               |
| Fe <sub>7</sub> S <sub>8</sub> @C NCs | SIBs | 0.08-3   | 447 mAh g <sup>-1</sup> after 1000 cycles at 180 mA g <sup>-1</sup>                                                                              | 17               |
| FeS@CNS                               | LIBs | 0.01-3   | 703 mAh g <sup>-1</sup> after 150 cycles at 1 A g <sup>-1</sup>                                                                                  | 18               |
| G@FeS-GNRs                            | LIBs | 0.01-3   | 536 mAh g <sup>-1</sup> after 100 cycles at 400 mA g <sup>-1</sup>                                                                               | 19               |
| FeS <sub>2</sub> /CNT                 | SIBs | 0.8-3    | 394 mAh g <sup>-1</sup> after 400 cycles at 200 mA g <sup>-1</sup> ; 309 mAh g <sup>-1</sup> after 1800 cycles at 1 A g <sup>-1</sup>            | 20               |
| <b>Fe<sub>7</sub>S<sub>8</sub>@C</b>  | LIBs | 0.01-3   | <b>781 mAh g<sup>-1</sup></b> after 500 cycles at 1 A g <sup>-1</sup> , <b>547.3 mAh g<sup>-1</sup></b> after 600 cycles at 5 A g <sup>-1</sup>  | <b>This work</b> |
|                                       | SIBs | 0.01-3   | <b>596 mAh g<sup>-1</sup></b> after 500 cycles at 1 A g <sup>-1</sup> , <b>530.8 mAh g<sup>-1</sup></b> after 1000 cycles at 5 A g <sup>-1</sup> | <b>This work</b> |

Table S2. Values of R<sub>ct</sub> obtained by fitting date.

|              | Li <sup>+</sup> /Rct( $\Omega$ ) | Na <sup>+</sup> /Rct( $\Omega$ ) |
|--------------|----------------------------------|----------------------------------|
| Before cycle | 52.25                            | 10.05                            |
| After cycle  | 18.62                            | 7.645                            |

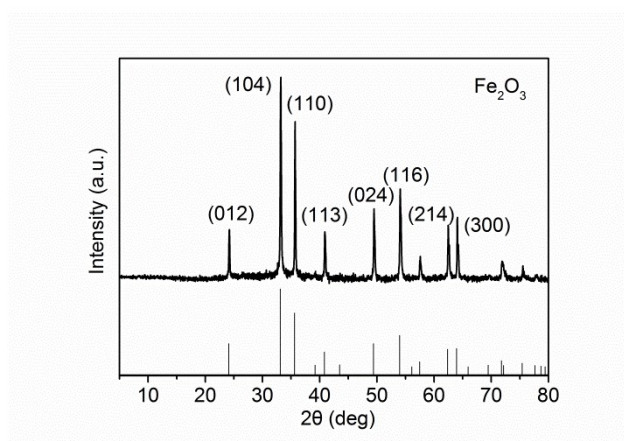

**Fig. S1.** XRD spectra of the pure Fe<sub>2</sub>O<sub>3</sub>.

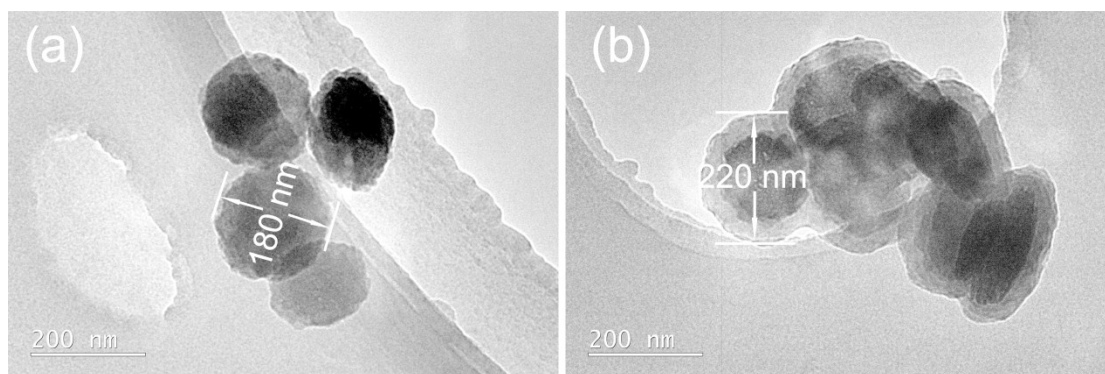

**Fig. S2.** TEM images of (a) Fe<sub>2</sub>O<sub>3</sub> and (b) Fe<sub>2</sub>O<sub>3</sub>@PDA.

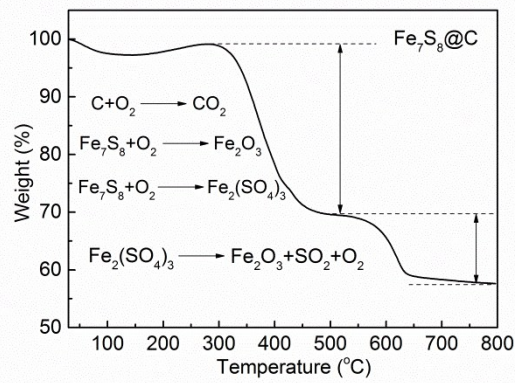

**Fig. S3.** TGA curves of Fe<sub>7</sub>S<sub>8</sub>@C.

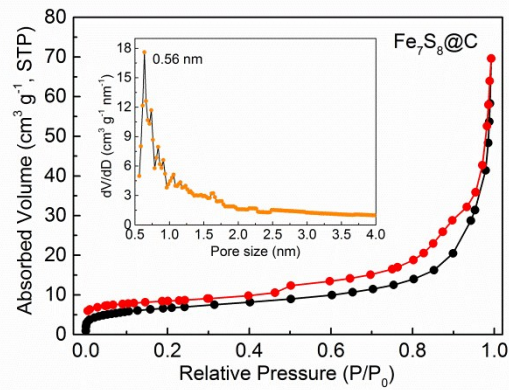

**Fig. S4.** The nitrogen adsorption/desorption isotherm plots. Micropore (inset) size distribution of Fe<sub>7</sub>S<sub>8</sub>@C.

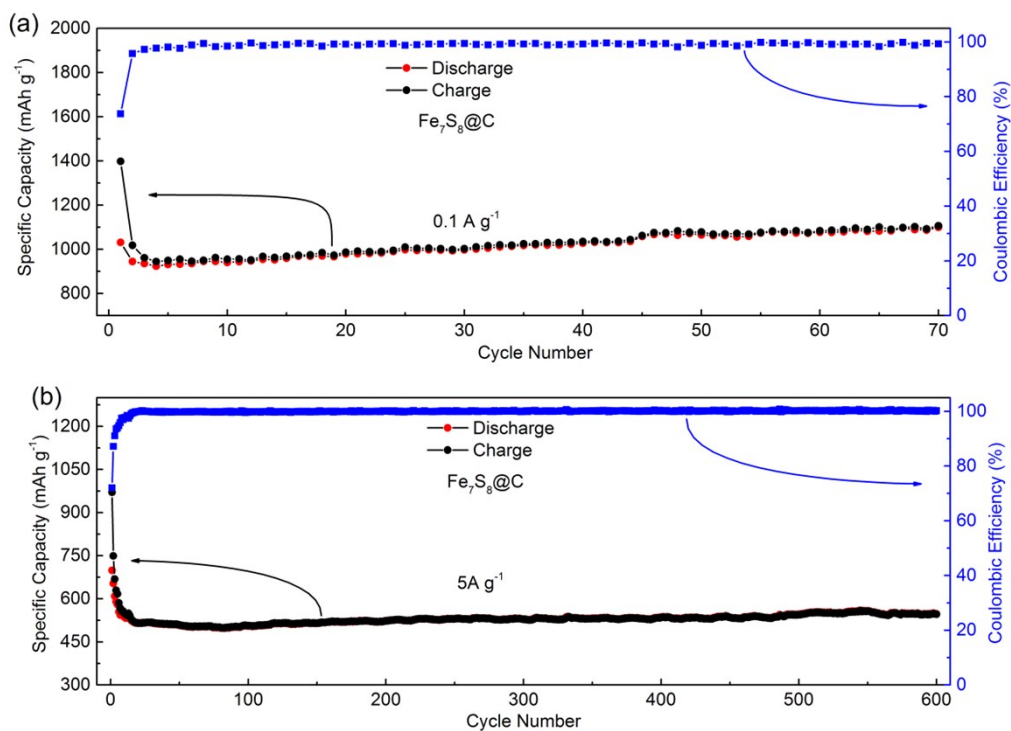

**Fig. S5.** Long-term cyclic performance at current densities of  $0.1 \text{ A g}^{-1}$  (a) and  $5 \text{ A g}^{-1}$  (b) for LIBs.

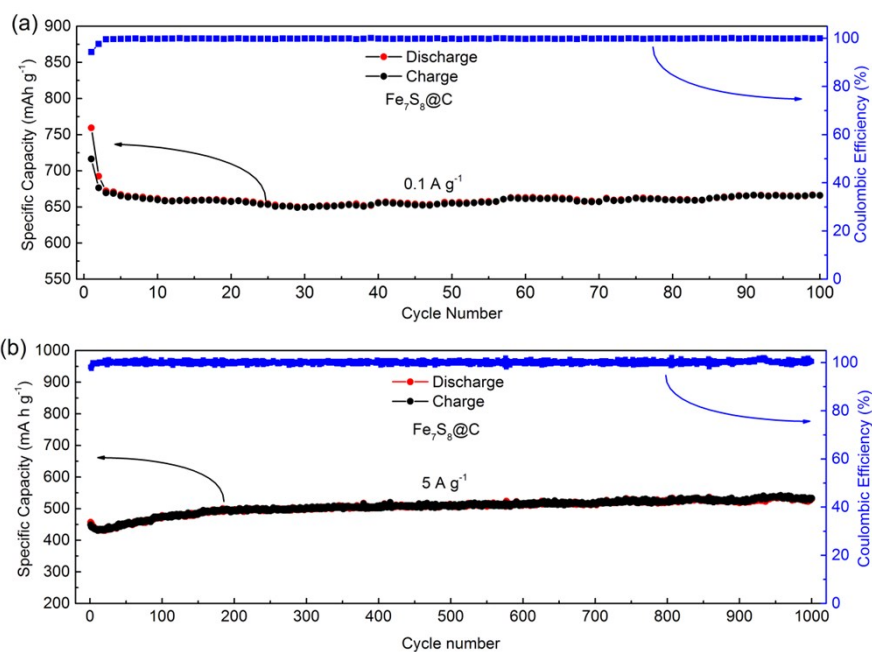

**Fig. S6.** Long-term cyclic performance at current densities of  $0.1 \text{ A g}^{-1}$  (a) and  $5 \text{ A g}^{-1}$  (b) for SIBs.

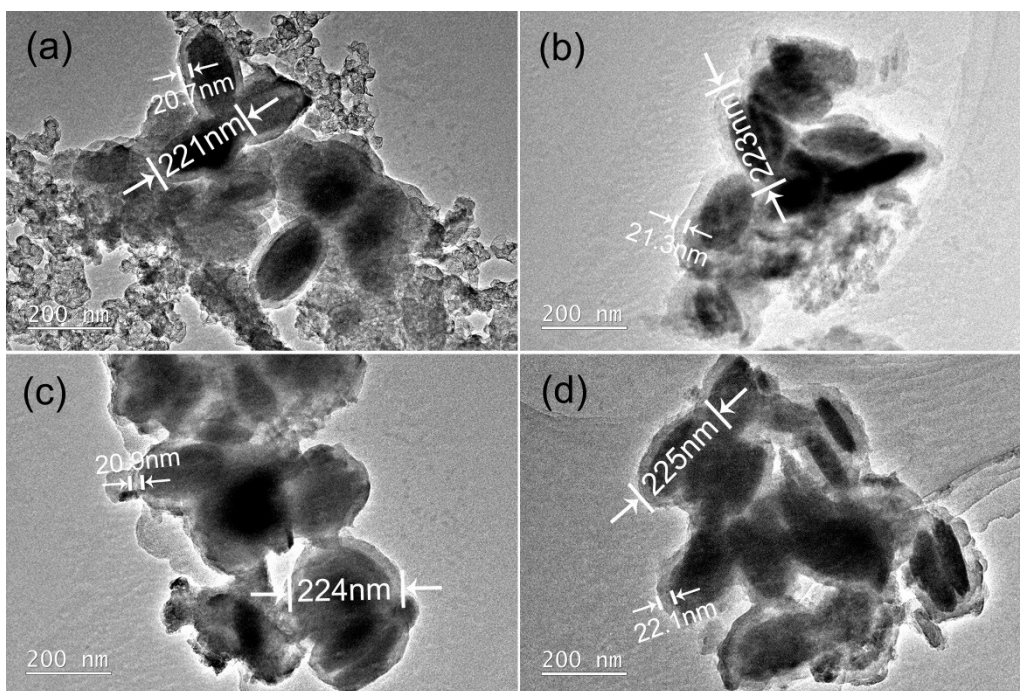

**Fig. S7.** TEM images of  $\text{Fe}_7\text{S}_8@\text{C}$  nanobiscuits electrodes after 1st cycle (a, c) and 500th cycle (b, d) at the current density of  $1 \text{ A g}^{-1}$  for (a, b) LIBs and (c, d) SIBs.

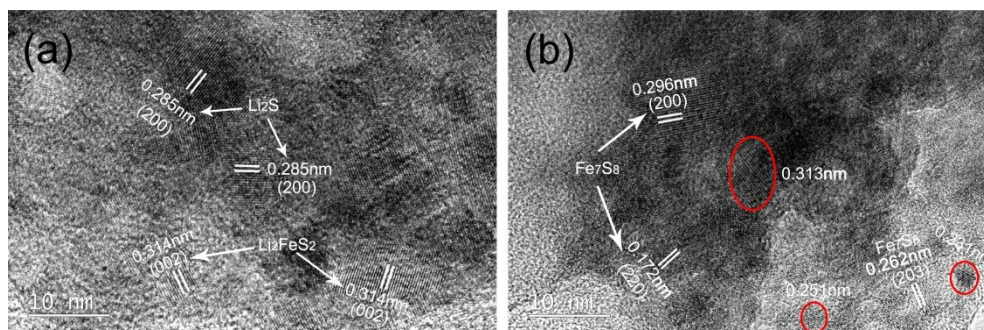

**Fig. S8.** Ex-situ HRTEM for LIBs (a) and SIBs (b) after first cycle, both batteries charge to 2 V.

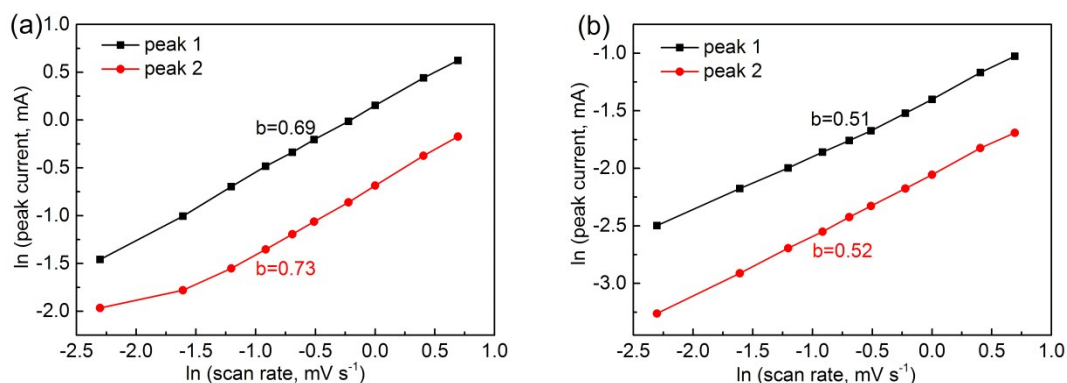

**Fig. S9.** The fitted lines and  $\ln$  (peak current) versus  $\ln$  (scan rate) plots at different oxidation (black) and reduction (red) state of (a) LIBs and (b) SIBs.

## Reference

- 1 L. Yu, J. F. Yang, X. W. Lou, *Angew. Chem. Int. Ed.*, 2016, **55**, 13422-13426.
- 2 L. M. Zhou, K. Zhang, J. Z. Sheng, Q. Y. An, Z. L. Tao, Y. M. Kang, J. Chen, L.Q. Maia, *Nano Energy.*, 2017, **35**, 281-289.
- 3 M. J. Choi, J. S. Kim, J. K. Yoo, S. M Yim, J. B. Jeon, Y. S. Jung, *Small.*, 2017, 1702816.
- 4 J. W. Chen, S. H. Li, V. Kumar, P. S. Lee, *Adv. Energy Mater.*, 2017, 1700180.
- 5 H. S. Fan, H. Yu, X. L. Wu, Y. Zhang, Z. Z Luo, H. W. Wang, Y. Y. Guo, S. Madhavi, Q. Y. Yan, *ACS Appl. Mater. Interfaces.*, 2016, **8**, 25261-25267.
- 6 J. T. Zhang, L. Yu, X. W. Lou, *Nano Res.*, 2017, **10**, 4298-4304.
- 7 Q. C. Pan, F. H. Zheng, X. Ou, C. H. Yang, X. H. Xiong, Z. H. Tang, L. Z. Zhao, M. L. Liu, *ACS Sustainable Chem. Eng.*, 2017, **5**, 4739-4745.
- 8 Z. M. Liu, T. C. Lu, T. Song, X. Y. Yu, X. W. Lou, U. Paik, *Energy Environ. Sci.*, 2017, **10**, 1576-1580.
- 9 R. M. Sun, S. J. Liu, Q. L. Wei, J. Z. Sheng, S. H. Zhu, Q. Y. An, L. Q. Mai, *Small.*, 2017, **13**, 1701744.
- 10 Y. Jiang, Y. B. Guo, W. J. Lu, Z. Y. Feng, B. J. Xi, S. S. Kai, J. H. Zhang, J. K. Feng, S. L. Xiong, *ACS Appl. Mater. Interfaces.*, 2017, **9**, 27697-27706.
- 11 S. B. Wang, B. Y. Guan, L. Yu, X. W. Lou, *Adv. Mater.*, 2017, **29**, 1702724.
- 12 G. Wang, J. Zhang, S. Yang, F. X. Wang, X. D. Zhuang, K. Müllen, X. L. Feng, *Adv. Energy Mater.*, 2017, 1702254.
- 13 Y. H. Zhang, N. N. Wang, C. H. Sun, Z. X. Lu, P. Xue, B. Tang, Z. C. Bai, S. X. Dou, *Chem. Eng. J.*, 2018, **332**, 370-376.
- 14 P. L. He, Y. J. Fang, X. Y. Yu, X. W. Lou, *Angew. Chem. Int. Ed.*, 2017, **56**, 12202-12205.
- 15 C. H. Yang, X. Ou, X. H. Xiong, F. H. Zheng, R. Z. Hu, Y. Chen, M. L. Liu, K. Huang, *Energy Environ. Sci.*, 2017, **10**, 107-113.
- 16 Y. Xiao, J. Y. Hwang, I. Belharouak, Y. K. Sun, *ACS Energy Lett.*, 2017, **2**, 364-372.



- 17 M. J. Choi, J. s. Kim, J. K. Yoo, S. Yim, J. Jeon, Y. S. Jung, *Small*, 2018, **14**, 1702816.
- 18 Y. X. Xu, W. Y. Li, F. Zhang, X. L. Zhang, W. J. Zhang, C. S. Lee, Y. B. Tang. *J. Mater. Chem. A*, 2016, **4**, 3697-3703.
- 19 L. Li, C. T. Gao, A. Kovalchuk, Z. W. Peng, G. D. Ruan, Y. Yang, H. L. Fei, Q. F. Zhong, Y. L. Li, J. M. Tour, *Nano Res.*, 2016, **9**, 2904-2911.
- 20 Y. Y. Chen, X. D. Hua, B. Evanko, X.H. Sun, X. Li, T. Y. Hou, S. Cai, C. M. Zheng, W. B. Hu, G. D. Stucky, *Nano Energy* 2018, **46**, 117-127.
